# Supplementary material for: Time-Dependent Finite Element Analysis of In Vivo Electrochemotherapy Treatment
Source: PubMed Central journal article supplement — Technol Cancer Res Treat. 2018 Aug 8;17:1533033818790510. doi: 10.1177/1533033818790510 (PMC6083743; doi:10.1177/1533033818790510), 2018-08-08
Supplement: supplementary_data_v1.pdf [file supplementary_data_v1.pdf]

# Time dependent finite-element analysis of in vivo electrochemotherapy treatment

## Supplementary data

| Symbol                     | Description                          | Value                            |
|----------------------------|--------------------------------------|----------------------------------|
| $\tau_{por}$               | Specific time of poration relaxation | 100 $\mu$ s                      |
| $\alpha_{\sigma}$          | Amplitude of pore growth model       | 0,35                             |
| $\tau_{\sigma}$            | Specific time of pore growth         | 15 $\mu$ s                       |
| $\alpha_T$                 | Amplitude of thermal model           | 0,125                            |
| $\tau_T$                   | Specific time of thermal diffusion   | 1,75 s                           |
| $\alpha_{\vartheta\sigma}$ | Amplitude of poration damage model   | 0,0015 m/V                       |
| $\alpha_{\vartheta T}$     | Amplitude of thermal damage model    | 25 m/V                           |
| $\alpha_C$                 | Amplitude of capacitive model        | $5 \cdot 10^{-4} \text{ m}^{-2}$ |
| $R_C$                      | Resistance of capacitive model       | 15 $\Omega$                      |
| $C$                        | Capacitance of capacitive model      | $1,2 \cdot 10^{-7} \text{ F}$    |

Table S 1: Other parameters of the time dependent electroporation model common for all tissues (taken from Langus et al. (2016))

## Results

(a)

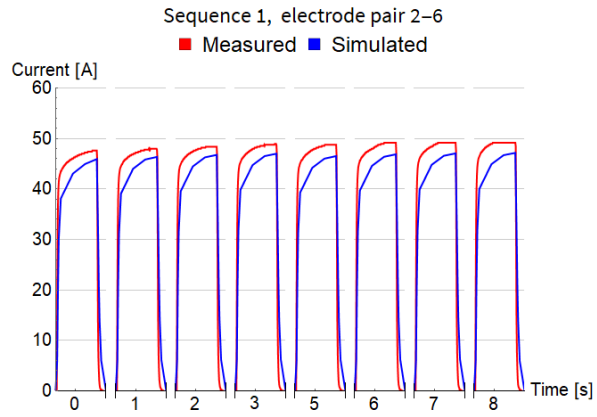

(b)

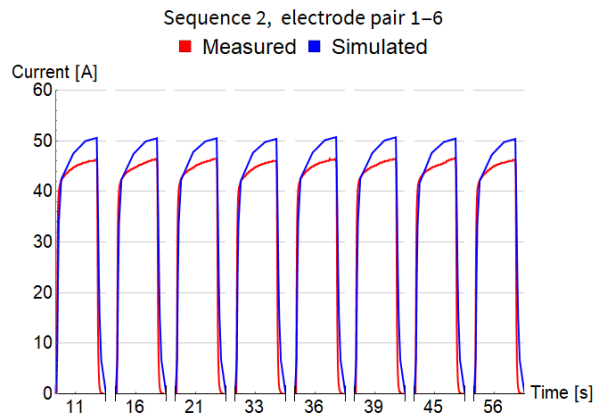

(c)

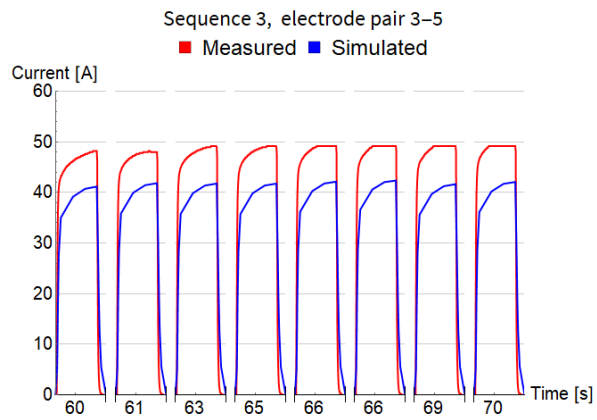

(d)

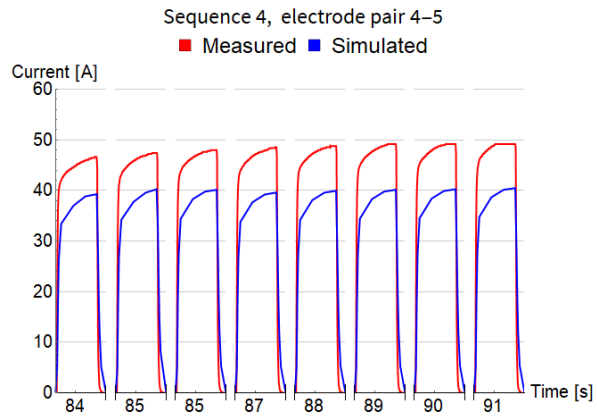

(e)

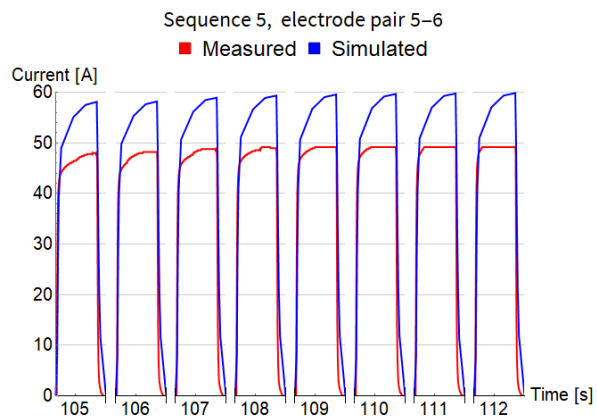

(f)

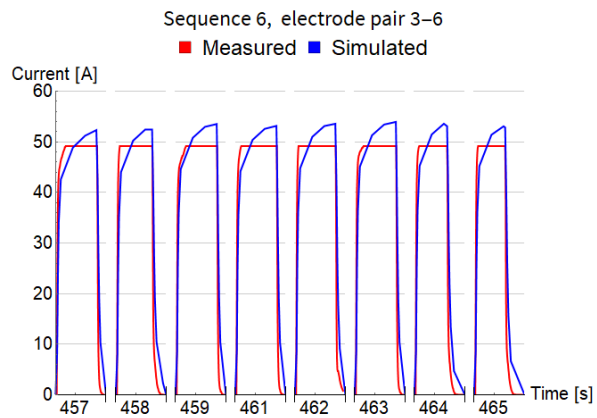

(g)  
)

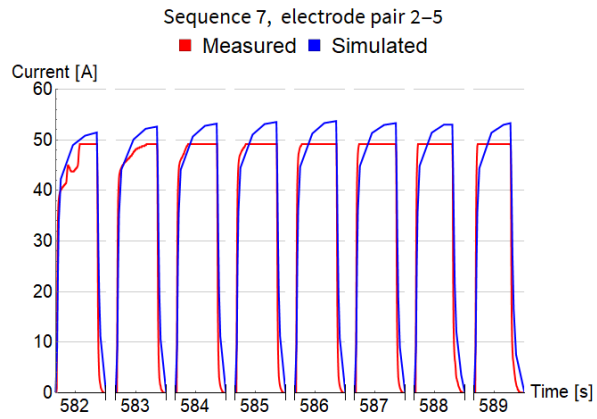

(h)  
)

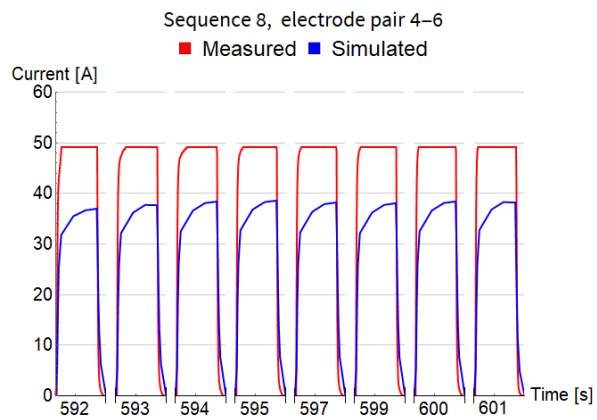

(i)

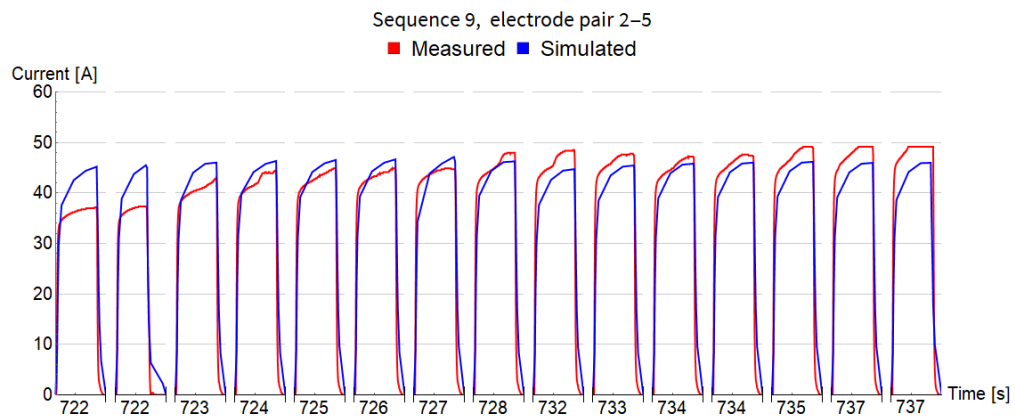

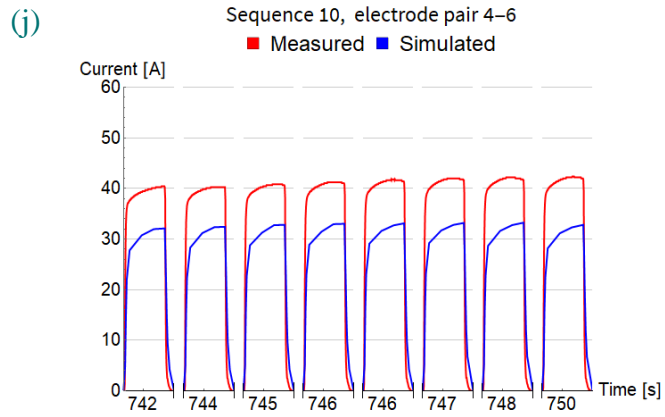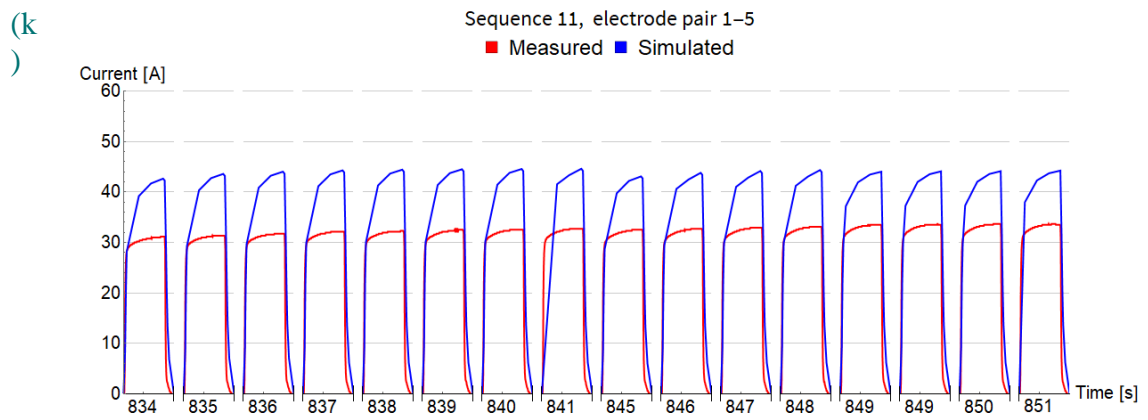

Figure S 1: (a-k) Comparison of simulated and measured current for all sequences and all pulses
